# Supplementary material for: Specific targeting of IL-1β activity to CD8+ T cells allows for safe use as a vaccine adjuvant
Source: PubMed Central journal article supplement (PMC7378068; doi:10.1038/s41541-020-00211-5), 2020-07-23
Supplement: 41541_2020_211_MOESM1_ESM.pdf [file 41541_2020_211_MOESM1_ESM.pdf]

**Specific targeting of IL-1 $\beta$  activity to CD8<sup>+</sup> T cells allows for safe use as a vaccine adjuvant**

Bram Van Den Eeckhout<sup>1,2</sup>, Lien Van Hoecke<sup>1,3</sup>, Elianne Burg<sup>1,2</sup>, Sandra Van Lint<sup>1,2</sup>, Frank Peelman<sup>1,2</sup>, Niko Kley<sup>4</sup>, Gilles Uzé<sup>5</sup>, Xavier Saelens<sup>1,3,6</sup>, Jan Tavernier<sup>1,2,4,\* $\pm$</sup>  and Sarah Gerlo<sup>1,2,\* $\pm$</sup>

<sup>1</sup> VIB-UGent Center for Medical Biotechnology, VIB, 9052 Ghent, Belgium

<sup>2</sup> Department of Biomolecular Medicine, Ghent University, 9000 Ghent, Belgium

<sup>3</sup> Department of Biomedical Molecular Biology, Ghent University, 9052 Ghent, Belgium

<sup>4</sup> Orionis Biosciences Inc., Waltham, 02451 MA, US

<sup>5</sup> CNRS 5235, University of Montpellier, 34090 Montpellier, France

<sup>6</sup> Department of Biochemistry and Microbiology, Ghent University, 9000 Ghent, Belgium

\* Shared senior authors

$\pm$  Corresponding authors:

VIB-UGent Center for Medical Biotechnology, Albert Baertsoenkaai 3, 9000 Ghent, Belgium

[jan.tavernier@vib-ugent.be](mailto:jan.tavernier@vib-ugent.be); [sarah.gerlo@ugent.be](mailto:sarah.gerlo@ugent.be)

---

**SUPPLEMENTARY FIGURES AND LEGENDS 1 – 8**

**SUPPLEMENTARY TABLES AND LEGENDS 1 – 2**

**a**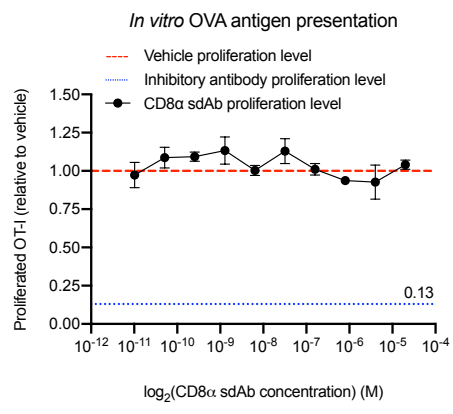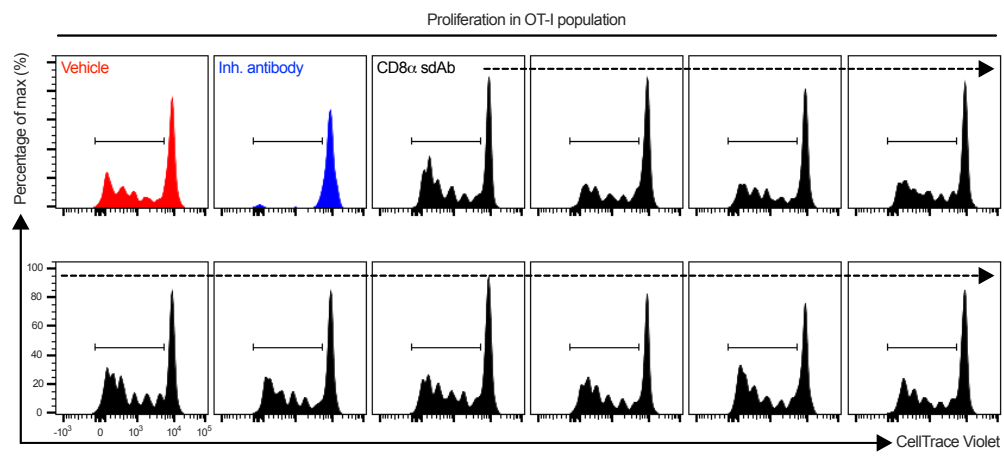**b**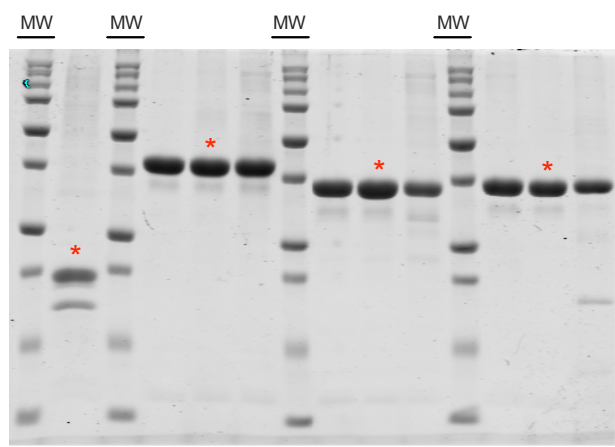**c**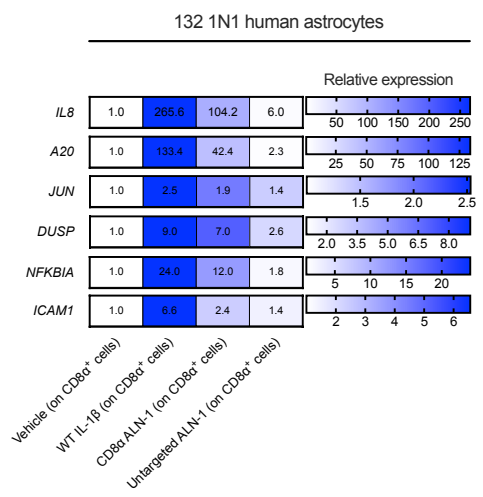**d**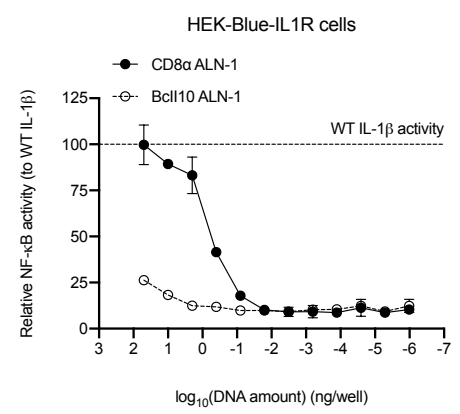**e**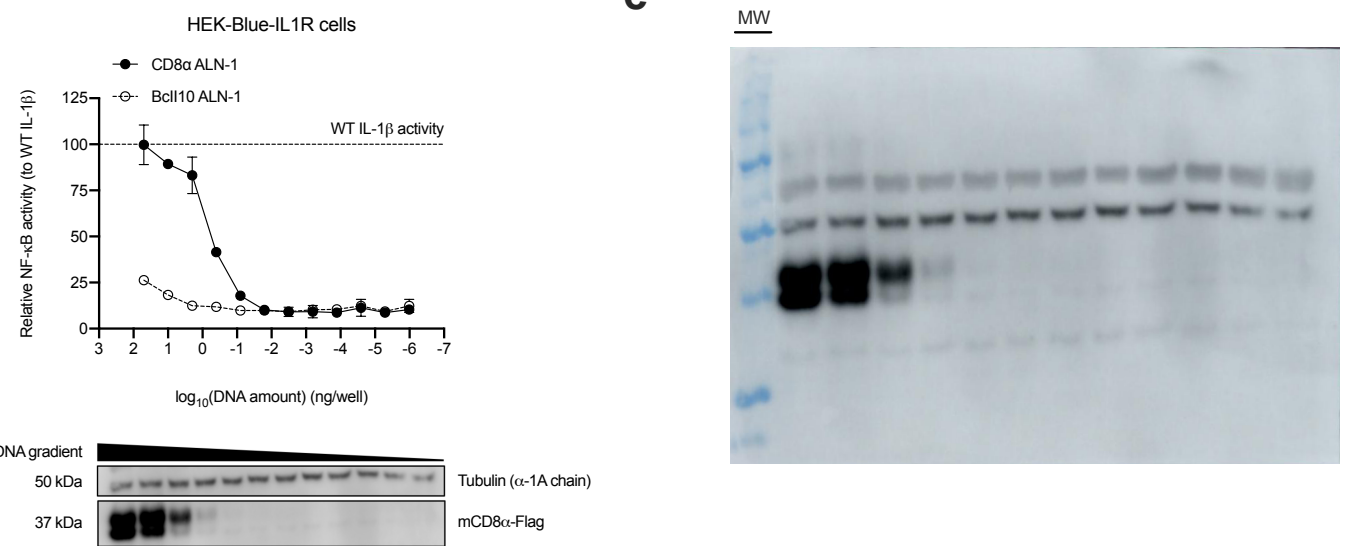

**Supplementary Figure 1. a.** The CD8 $\alpha$  sdAb does not interfere with CD8<sup>+</sup> T cell activation *in vitro*. The CD8 $\alpha$  sdAb was tested (20  $\mu$ M top concentration and 1:5 serial dilution) *in vitro* using the OT-I co-culture system. OT-I activation was assessed by flow cytometry after 72h of culture by evaluating proliferation (CellTrace Violet (CTV) dilution). OT-I cells were detected in the single cell population (based on FSC/SSC) as CD3<sup>+</sup>CD4-CTV<sup>labeled</sup> cells. *Left:* Quantification of OT-I proliferation. Data points represent the mean proliferation under treatment conditions relative to vehicle  $\pm$  s.e.m. of one experiment. Treatment with inhibitory antibody is shown as control. *Right:* Representative histograms illustrating unaltered OT-I proliferation in the presence of the CD8 $\alpha$  sdAb. **b.** Full and un-cropped image of the representative SDS-PAGE protein gel, with red stars indicating the bands shown in Fig. 1d. **c.** Heat maps showing gene expression (relative to vehicle) of *IL8*, *A20*, *JUN*, *DUSP*, *NFKBIA* and *ICAMI* in CD8 $\alpha$ <sup>+</sup> 132 1N1 human astrocytes upon stimulation with WT IL-1 $\beta$ , CD8 $\alpha$  ALN-1 or untargeted ALN-1 (0.5 nM). Representative heat maps of two independent experiments. **d.** The biological activity of CD8 $\alpha$  ALN-1 upon targeting is dependent on the level of target antigen expression. NF- $\kappa$ B-driven luciferase reporter gene expression induced by CD8 $\alpha$  ALN-1 (1 nM) in HEK-Blue-IL1R cells, transiently transfected with CD8 $\alpha$  (50 ng top concentration and 1:5 serial dilution). *Top:* NF- $\kappa$ B activity is normalized to  $\beta$ -galactosidase activity and expressed as fold induction compared to the activity of WT IL-1 $\beta$  (1 nM) for every tested DNA concentration. Data points represent the mean of two independent experiments  $\pm$  s.e.m. Untargeted BcII10 ALN-1 (1 nM) is included as control. *Bottom:* Western Blot image of total HEK-Blue-IL1R cell lysates, demonstrating decreasing CD8 $\alpha$  protein (37 kDa) levels with decreasing levels of transfected plasmid DNA. Tubulin (50 kDa) is included as loading control. Staining with primary antibodies against Flag-tag (Sigma F7425) and tubulin (Sigma T6199). Secondary detection with HRP-conjugated antibodies against rabbit and mouse IgG (GE Healthcare). Detection by chemiluminescence using the Amersham Imager 680 (GE Healthcare). Representative Western Blot of two independent experiments. **e.** Full and un-cropped image of the representative Western Blot shown in Supplementary Fig. 1d, *bottom*. Samples shown in all gels and blots are derived from the same experiment and were processed in parallel.

**a****Panel 1: T cell binding**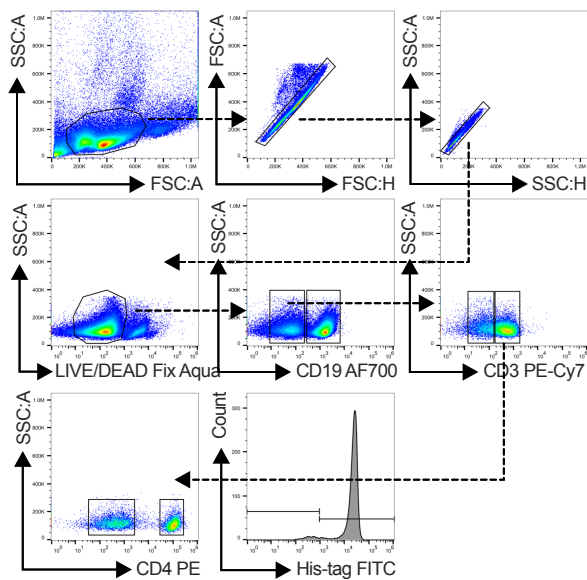**b****Panel 2: cDC and myloid cell binding**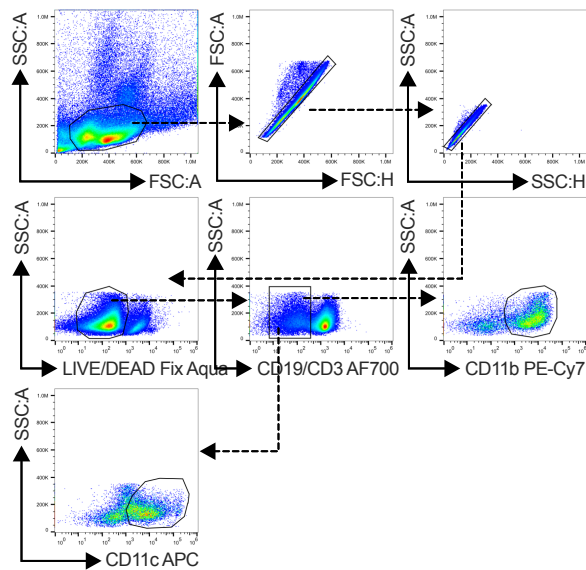**c****Panel 3: CTL and cDC titration**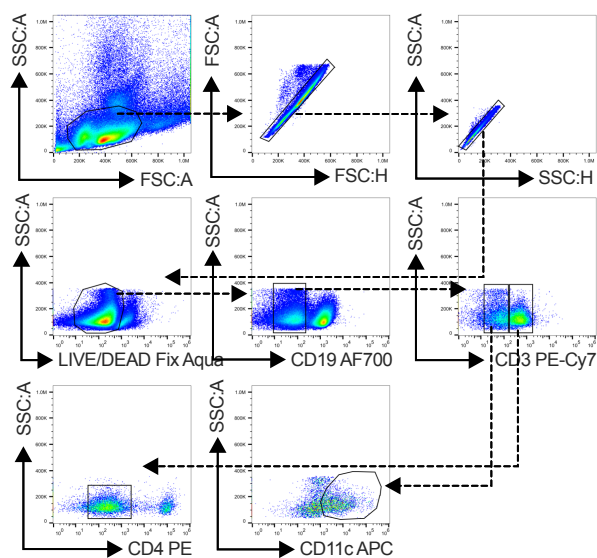**d****Panel 4: type I cDC binding**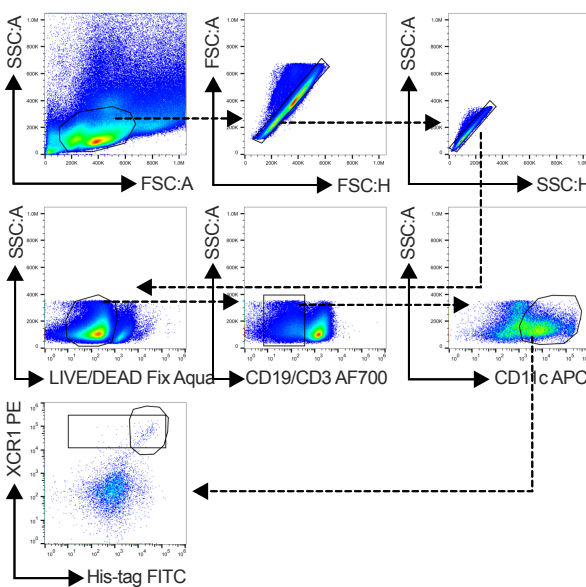**e****Binding on splenocytes**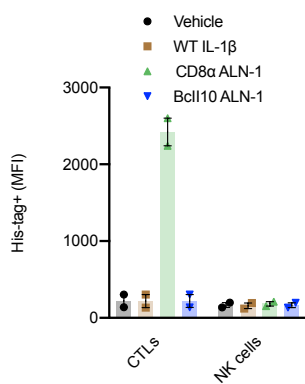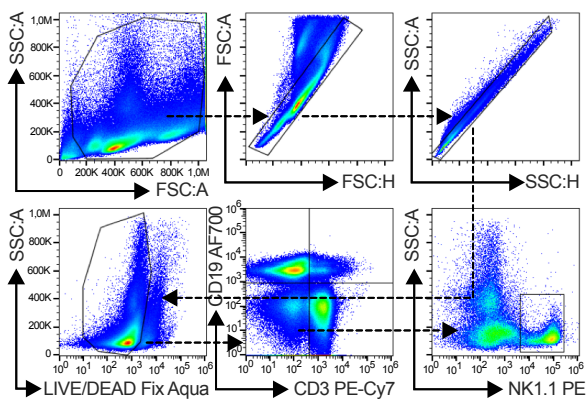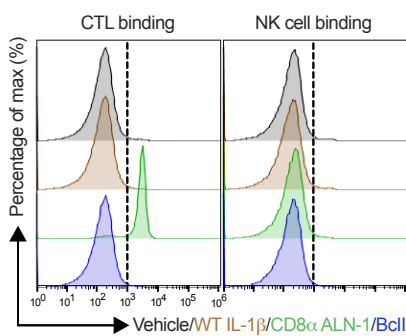

**Supplementary Figure 2. a – d.** Gating strategy for the detection of CD8 $\alpha$  ALN-1 binding in C57BL/6 (IL-1R1<sup>-/-</sup>) splenocyte pools via flow cytometry. Staining with LIVE/DEAD dye and CD19, CD3, CD4, CD11b, CD11c, XCR1 and anti-His-tag antibodies. **e. Left:** CD8 $\alpha$  ALN-1 (1 nM) does not bind NK cells in a mixed pool of C57BL/6 splenocytes, whereas strong CTL targeting is apparent. Bars represent the mean  $\pm$  s.e.m. of two independent experiments. Controls include vehicle, WT IL-1 $\beta$  and untargeted BcII10 ALN-1 (1 nM) binding. Representative histograms are included below the graph. **Right:** Flow cytometry gating strategy for this analysis. Staining with LIVE/DEAD dye and CD19, CD3, CD4, NK1.1 (100x dilution) (clone PK136, 108707, BioLegend) and anti-His-tag antibodies. NK cells were identified as CD19<sup>-</sup>CD3<sup>-</sup>NK1.1<sup>+</sup> within the single (based on FSC/SSC) and living (LIVE/DEAD<sup>-</sup>) cell population.

**a**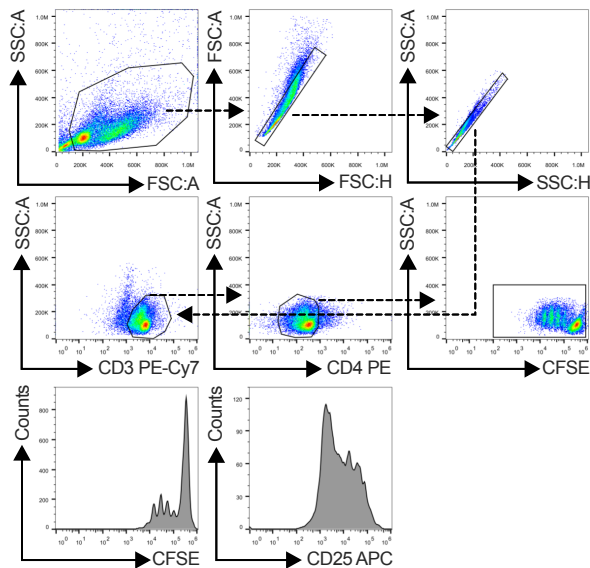**b**CD8 $\alpha$  ALN-1-induced OT-I proliferation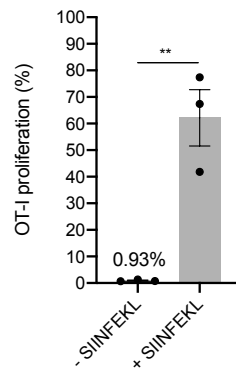**c**OT-I proliferation IL-1R1<sup>-/-</sup> BM-DCs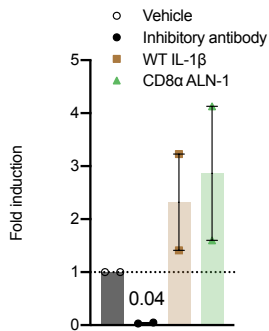**d**

WT co-culture cytokine release

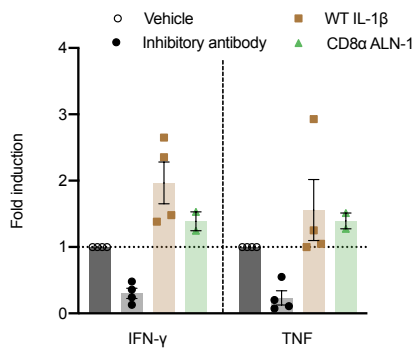

**Supplementary Figure 3. a.** Gating strategy for the *in vitro* OT-I co-culture experiments. Staining with CD3, CD4 and CD25 antibodies and detection of OT-I cells in the single (based on FSC/SSC) cell population as CD3<sup>+</sup>CD4<sup>+</sup>CFSE<sup>labeled</sup> cells. Proliferation is calculated as a measure of CFSE dilution. CD25 upregulation was evaluated in the proliferated OT-I subset. **b.** OT-I proliferation induced upon stimulation with CD8 $\alpha$  ALN-1 (1 nM) in the absence or presence of SIINFEKL on BM-DCs. Bars represent the mean  $\pm$  s.e.m. of three independent experiments. \*\*,  $p < 0.01$  by unpaired Student's *t*-test (two-tailed). **c.** Flow cytometry analysis of OT-I proliferation (CFSE dilution) upon stimulation with CD8 $\alpha$  ALN-1 (1 nM) in *in vitro* OT-I co-cultures with IL-1R1<sup>-/-</sup> BM-DCs. Controls include the activity of vehicle, inhibitory antibody and WT IL-1 $\beta$  (1 nM). Each bar represents the mean fold induction (CFSE dilution under treatment conditions relative to vehicle)  $\pm$  s.e.m. of two independent experiments. **d.** ELISA detection of IFN- $\gamma$  (*left*) and TNF (*right*), released in the conditioned supernatant of *in vitro* OT-I cocultures (with WT BM-DCs) upon stimulation with CD8 $\alpha$  ALN-1 (1 nM). Each bar represents the mean fold induction (cytokine release under treatment conditions relative to vehicle)  $\pm$  s.e.m. of at least two independent experiments. Controls include vehicle, inhibitory antibody and WT IL-1 $\beta$  (1 nM). IFN- $\gamma$  (CMC4033, Thermo Fisher Scientific) and TNF (DY410, R&D Systems) were detected in the conditioned supernatant by ELISA, following the manufacturer's instructions.

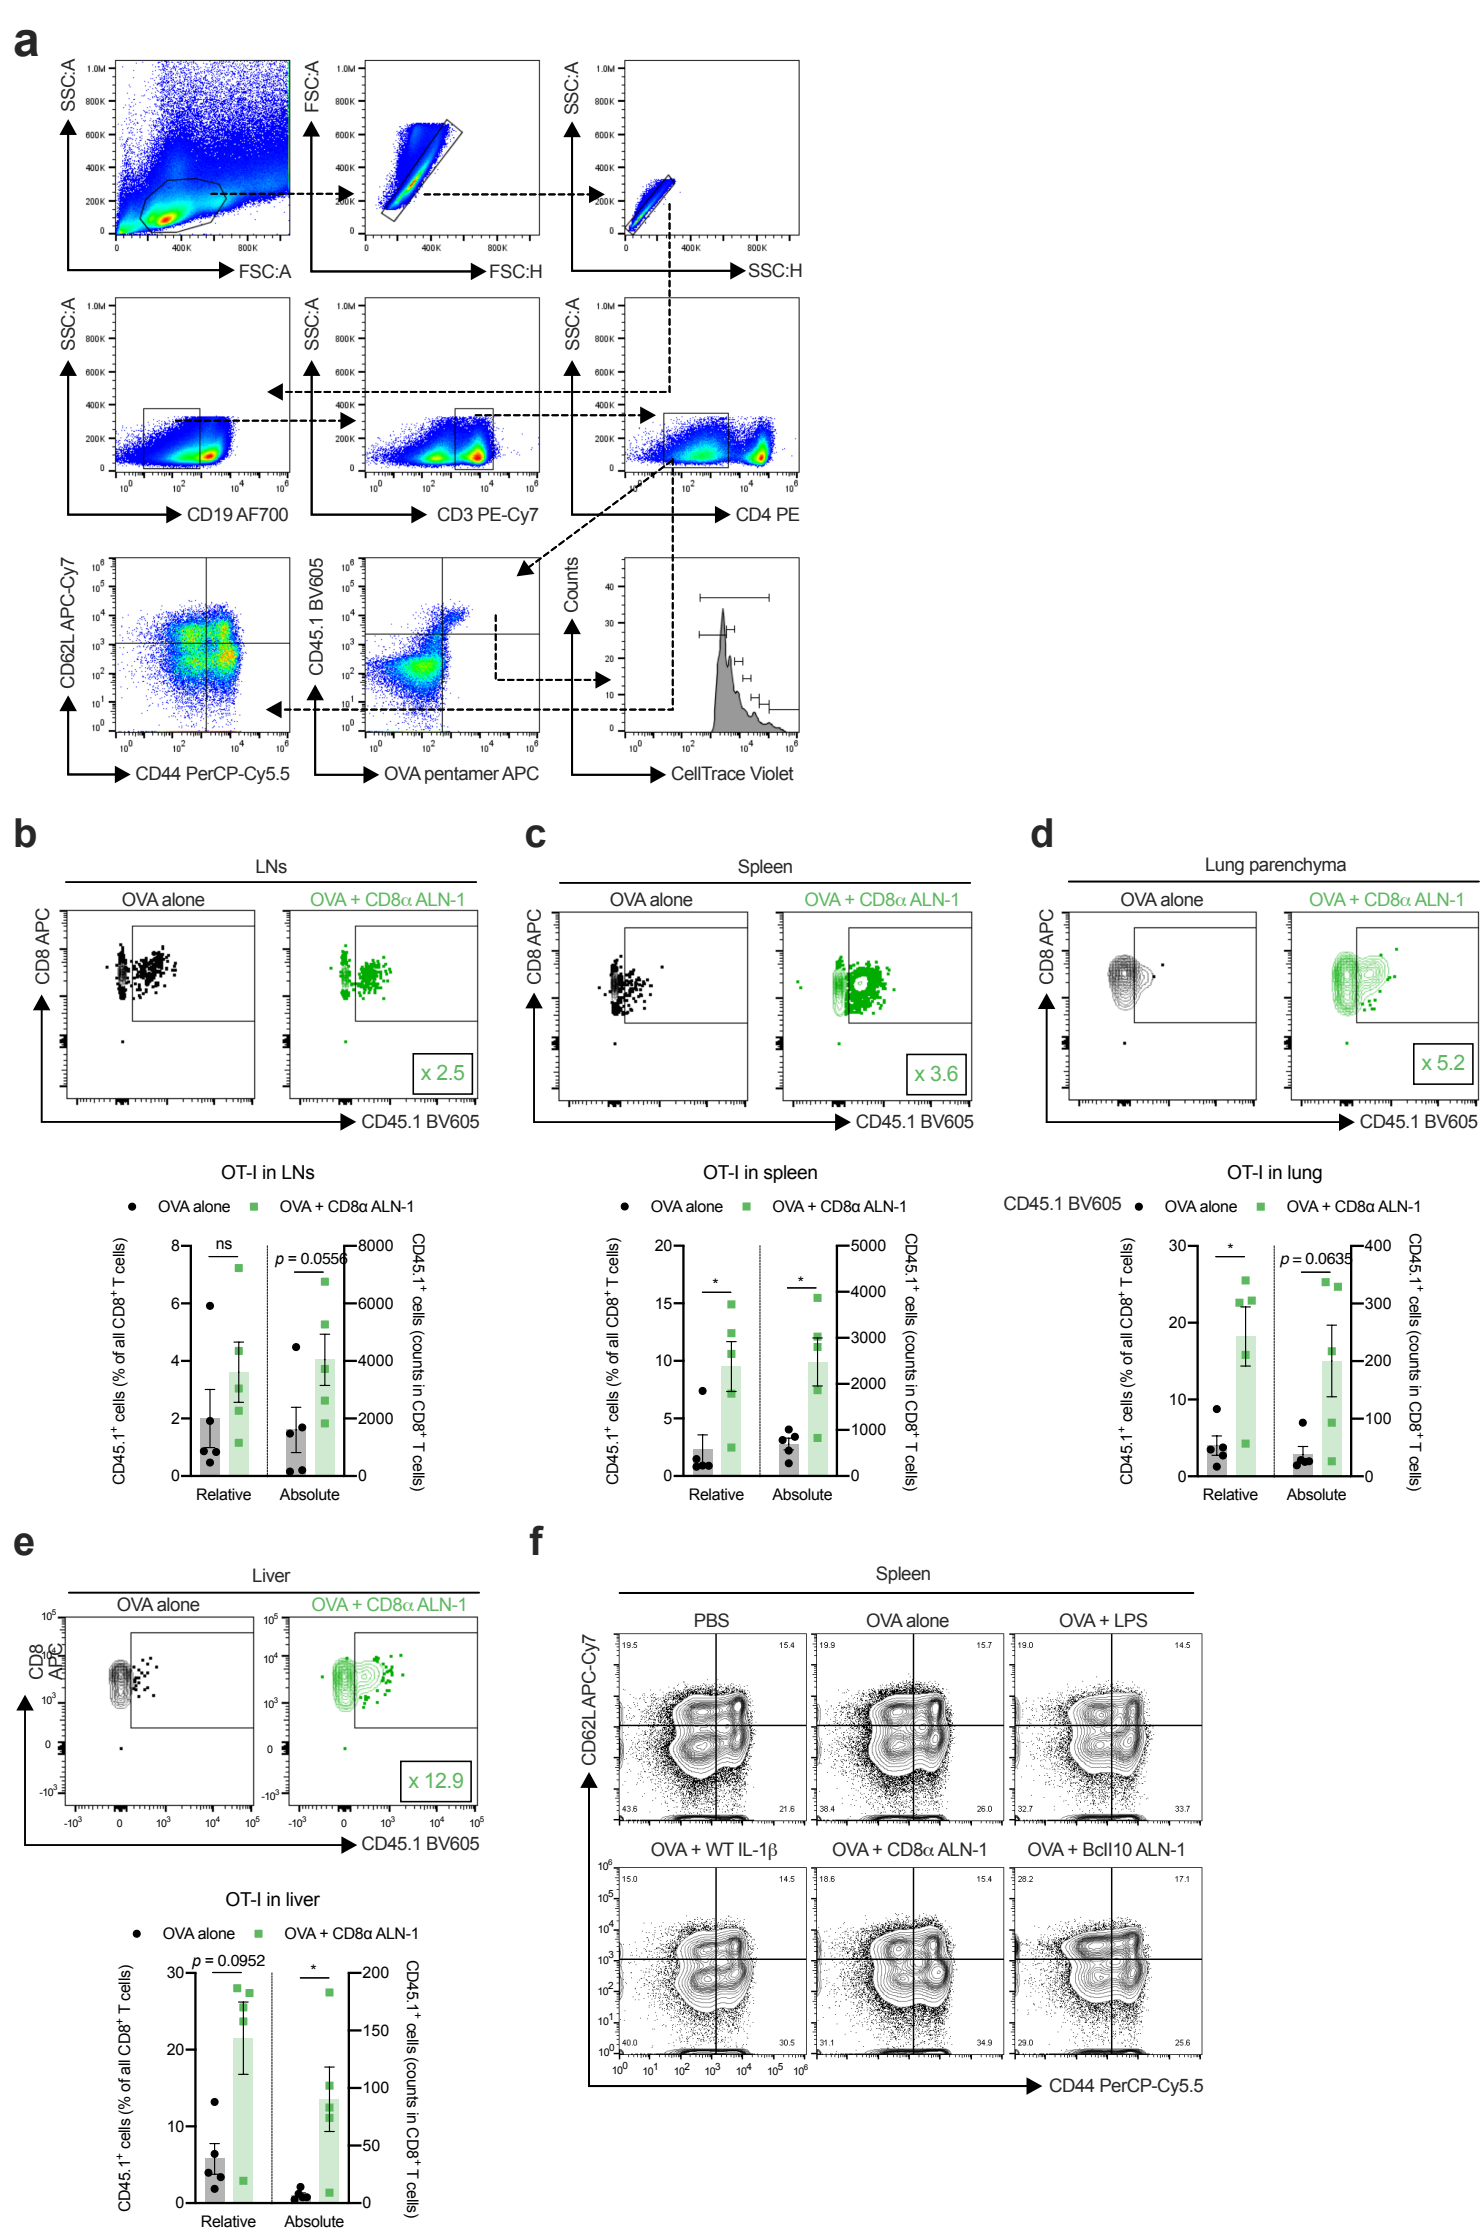



**Supplementary Figure 4. a.** Gating strategy for the detection of CTL activation and OT-I proliferation after transfer in C57BL/6 (IL-1R1<sup>-/-</sup>) recipient mice. Staining of splenocytes with CD19, CD3, CD4, CD62L, CD44 and CD45.1 antibodies and OVA-pentamer. **b – e.** Immunization with OVA and CD8 $\alpha$  ALN-1 promotes OT-I proliferation and increases the amount of OT-I cells in lymphoid and peripheral tissues compared with OVA treatment alone. Experiment performed according to Fig. 3a with two treatment groups: OVA (100  $\mu$ g i.p.) alone or combined with CD8 $\alpha$  ALN-1 (10  $\mu$ g i.p. daily for three consecutive days). Staining with LIVE/DEAD dye and CD19, CD3, CD4, CD8 APC (250x dilution) (clone 53-6.7, 553035, BioLegend) and CD45.1 antibodies. OT-I cells were detected in the single cell population (based on FSC/SSC) as LIVE/DEAD<sup>-</sup>CD19<sup>-</sup>CD3<sup>+</sup>CD4<sup>-</sup>CD8<sup>+</sup>CD45.1<sup>+</sup> cells. Displayed are the relative (% in the CD8<sup>+</sup> T cell population) and absolute (counts in the CD8<sup>+</sup> T cell population) amounts of OT-I cells in LNs (**b**), spleen (**c**), lungs (**d**) and liver (**e**). Bars represent the mean  $\pm$  s.e.m. of one experiment with  $n = 5$  mice/group. \*,  $p < 0.05$ ; ns,  $p \geq 0.05$  by unpaired Mann-Whitney U test (two-tailed). **f.** Representative dot plots illustrating simultaneous upregulation of CD44 and downregulation of CD62L on CTLs upon treatment with OVA and CD8 $\alpha$  ALN-1. Controls include treatment without antigen (PBS) and with OVA alone or combined with either LPS, WT IL-1 $\beta$  or BcII10 ALN-1.

**a**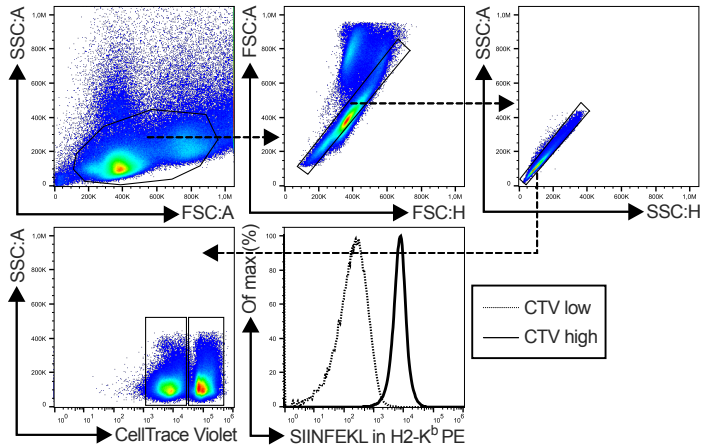**b**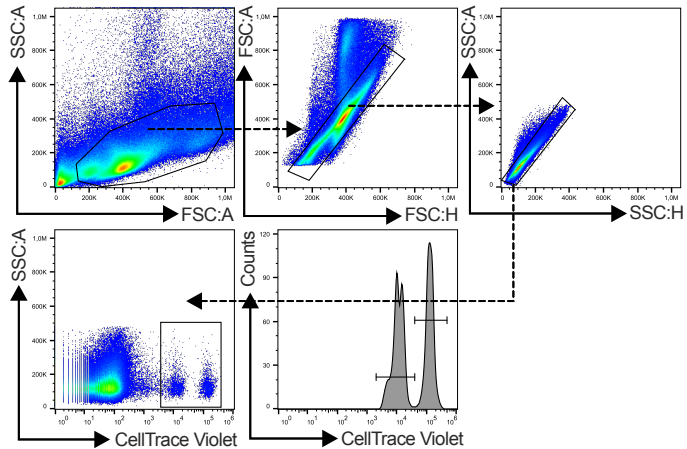

**Supplementary Figure 5. a.** Splenocyte labeling for the *in vivo* killing assay experiment. Cells were labeled with a high or low intensity of CTV and loaded with SIINFEKL (CTV<sup>high</sup>) or left unloaded (CTV<sup>low</sup>). Peptide presentation is detected with a SIINFEKL in H2-K<sup>b</sup> antibody. **b.** Gating strategy for the detection of adoptively transferred target cells in the spleens of acceptor mice.

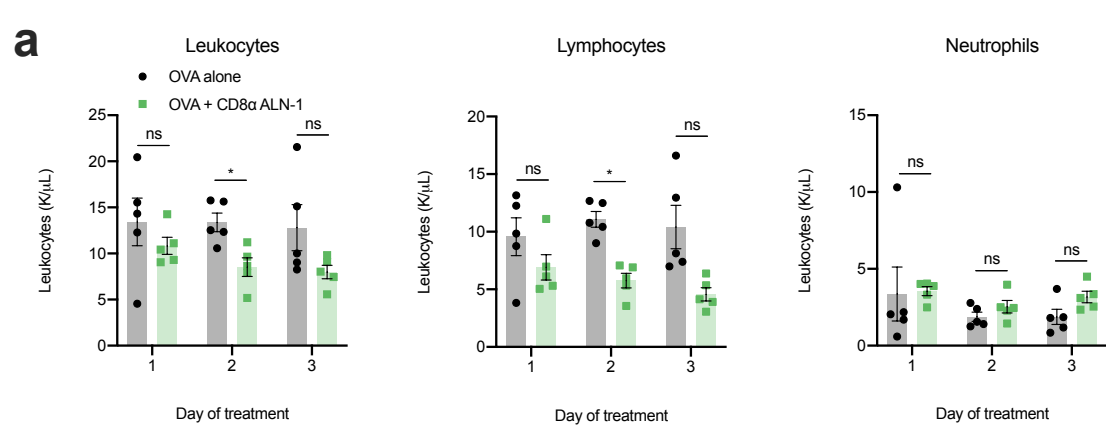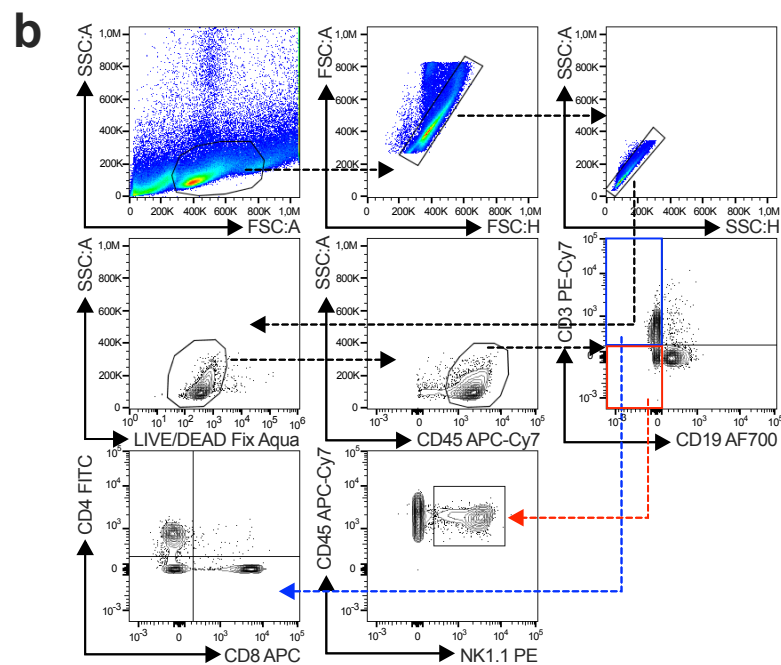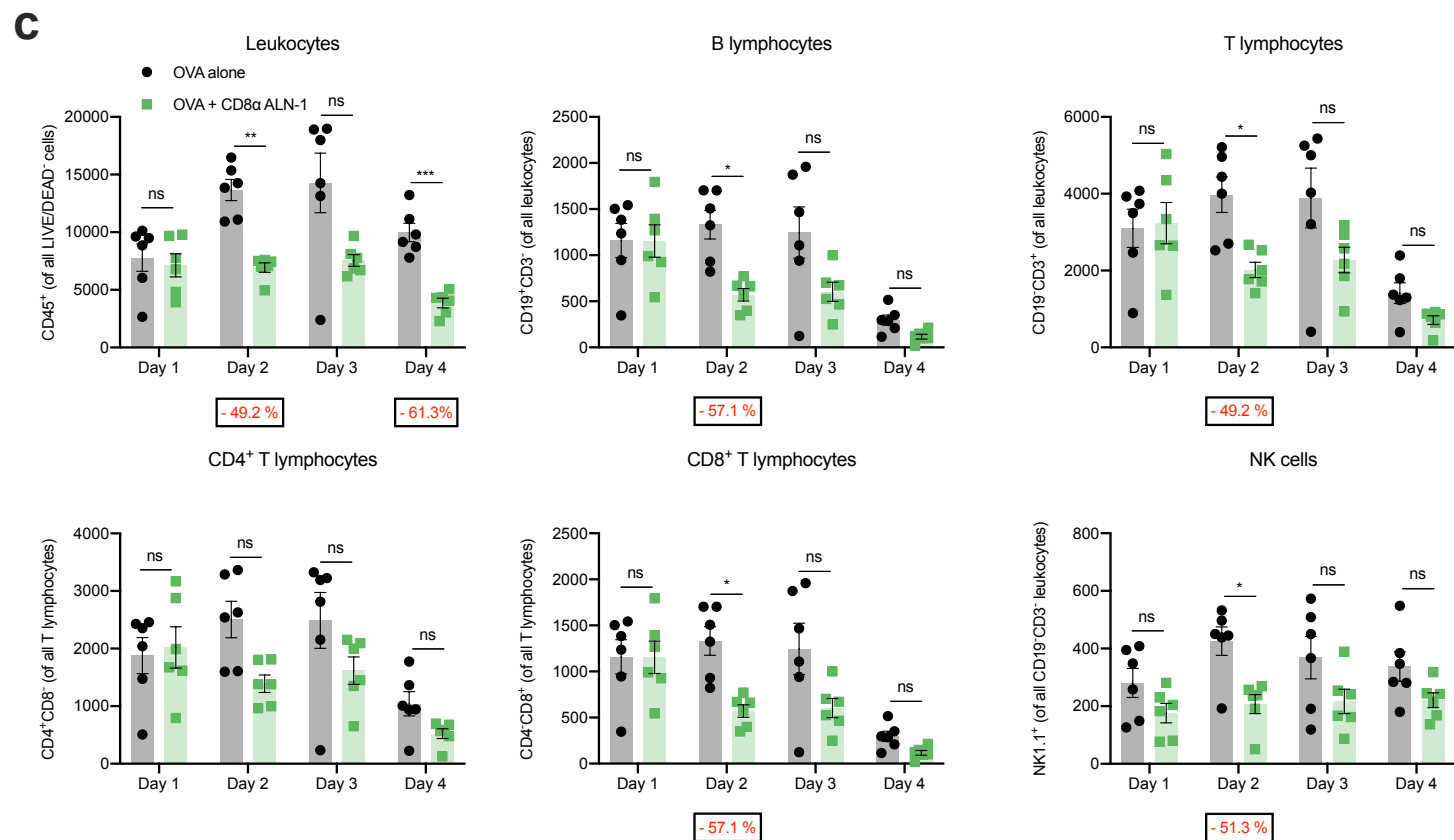

**Supplementary Figure 6. a.** C57BL/6 mice were treated i.p. with OVA (100  $\mu$ g), either alone or combined with CD8 $\alpha$  ALN-1 (daily i.p. treatment with 10  $\mu$ g for three consecutive days). Tail vein blood was sampled 6h after every administration and analyzed on the Hemavet 950FS system. Bars represent the mean  $\pm$  s.e.m. of one experiment with  $n = 5$  mice/group. **b.** Gating strategy for the detection of different lymphocyte populations in mouse peripheral blood. Staining with LIVE/DEAD dye and CD45, CD19, CD3, CD4, CD8 and NK1.1 antibodies. **c.** Flow cytometry analysis for measurement of absolute cells counts in mouse peripheral blood, sampled at the indicated timepoints as described in (a). Day 4 means sampling 24h after the last treatment. In the single (based on FSC/SSC) living (LIVE/DEAD $^{-}$ ) cell population, we identified leukocytes (CD45 $^{+}$ ), B cells (CD45 $^{+}$ CD19 $^{+}$ CD3 $^{-}$ ), T cells (CD45 $^{+}$ CD19 $^{-}$ CD3 $^{+}$ ), CD4 $^{+}$  T cells (CD45 $^{+}$ CD19 $^{-}$ CD3 $^{+}$ CD4 $^{+}$ CD8 $^{-}$ ), CD8 $^{+}$  T cells (CD45 $^{+}$ CD19 $^{-}$ CD3 $^{+}$ CD4 $^{-}$ CD8 $^{+}$ ) and NK cells (CD45 $^{+}$ CD19 $^{-}$ CD3 $^{-}$ NK1.1 $^{+}$ ). Bars represent the mean  $\pm$  s.e.m. of one experiment with  $n = 6$  mice/group. \*\*\*,  $p < 0.001$ ; \*\*,  $p < 0.01$ ; \*,  $p < 0.05$ ; ns,  $p \geq 0.05$  by two-way repeated measures ANOVA with Sidak's multiple comparisons test in (a) and (c).

**a** Gating strategy lymph nodes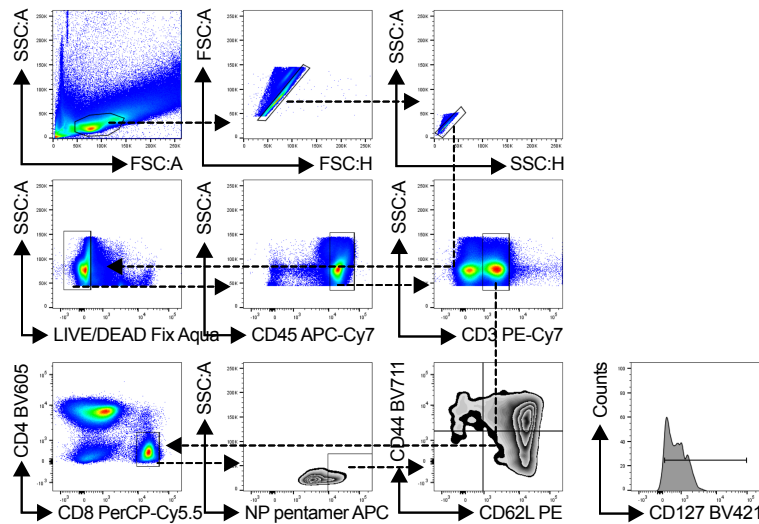**b** Gating strategy lung parenchyma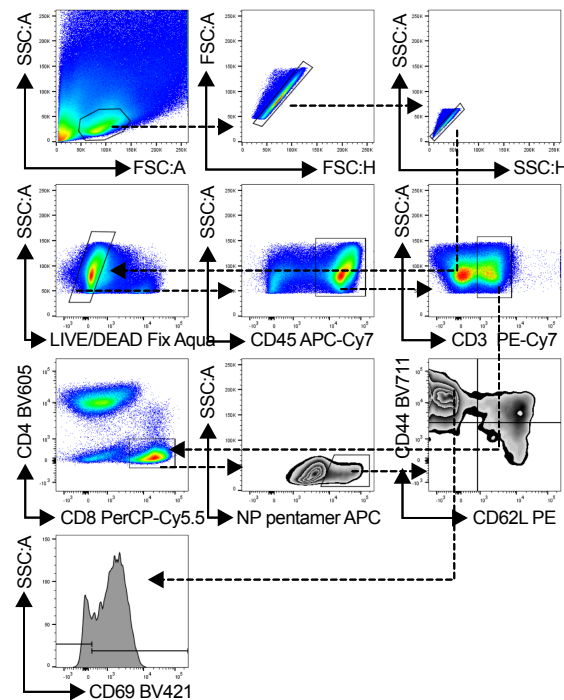**c** Gating strategy lung parenchyma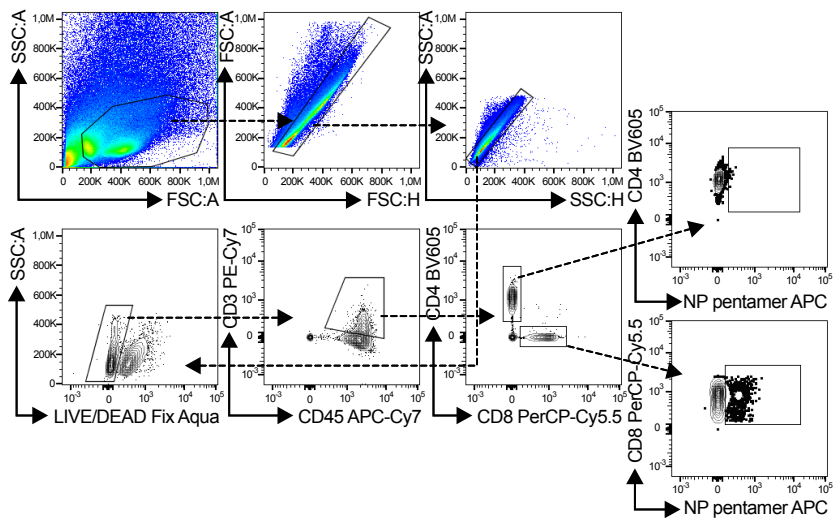

**Supplementary Figure 7. a and b.** Gating strategy for the detection of NP-specific CTLs in lung-draining mediastinal LNs (**a**) or lung parenchyma (**b**) one week *post*-influenza infection. Staining with LIVE/DEAD dye, CD45, CD3, CD4, CD8, CD44, CD62L, CD127 and CD69 antibodies and NP-pentamer. **c.** Gating strategy for the detection of long-lasting NP-specific CTLs in lung parenchyma 50 days *post*-influenza infection. Staining with LIVE/DEAD dye, CD45, CD3, CD4 and CD8 antibodies and NP-pentamer. Panels on the right indicate the cleanliness of the NP pentamer staining, which is shown to be selective for CD8<sup>+</sup> T cells.

**a****Lung parenchyma FACS gating strategy**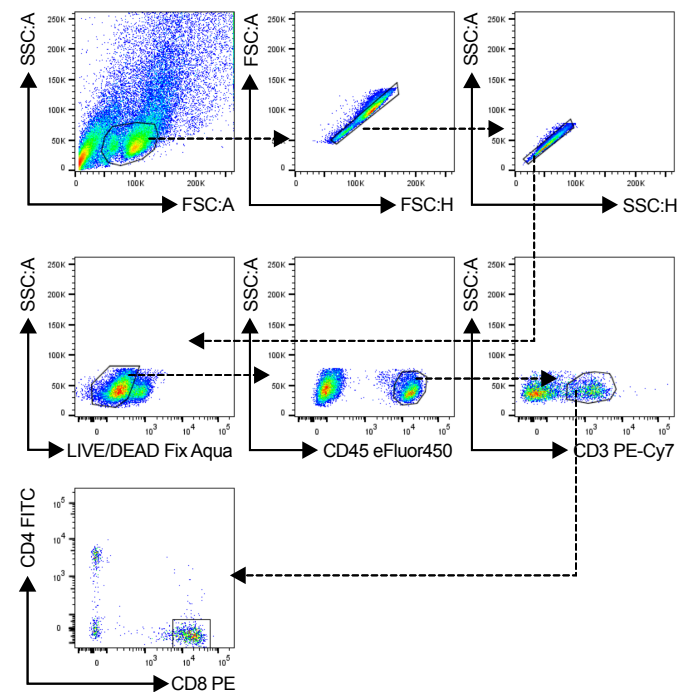**b****Draining LNs FACS gating strategy**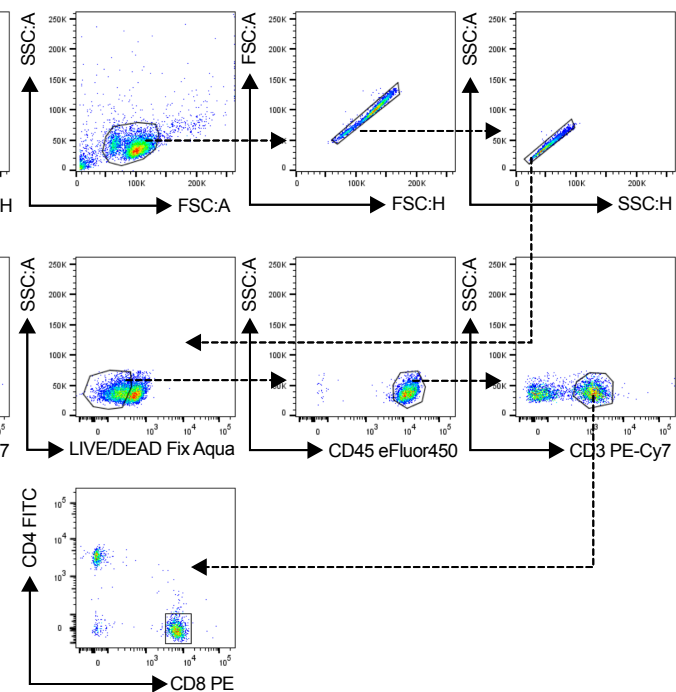**c**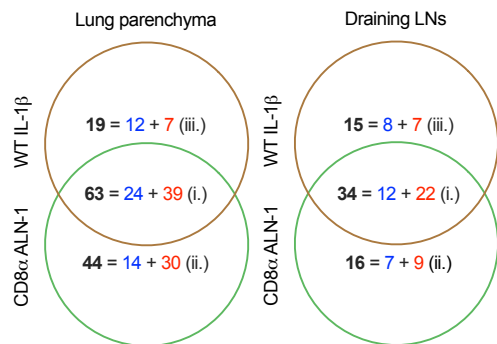



**Supplementary Figure 8.** Gating strategy for sorting CD8<sup>+</sup> T lymphocytes from the lung parenchyma (**a**) and lung-draining LNs (**b**) of influenza-infected mice one week *post*-influenza A virus challenge. Staining with LIVE/DEAD dye and CD45, CD3, CD4 and CD8 antibodies. **c.** Venn diagrams representing the numbers of DEGs shared between (i.) or unique for treatment with WT IL-1 $\beta$  (iii.) and/or CD8 $\alpha$  ALN-1 (ii.). Upregulated genes are printed in blue, whereas downregulated genes are printed in red. In CD8<sup>+</sup> T cells isolated from lung, 63 differentially expressed genes (DEGs) (24 up- and 39 downregulated) were shared between WT IL-1 $\beta$  and CD8 $\alpha$  ALN-1-vaccinated mice. Both WT IL-1 $\beta$  and CD8 $\alpha$  ALN-1 had non-redundant effects on gene modulation in lung, as evidenced by 19 DEGs (12 up- and 7 downregulated) unique to WT IL-1 $\beta$  and 44 DEGs (14 up- and 30 downregulated) unique to CD8 $\alpha$  ALN-1 treatment. In CD8<sup>+</sup> T cells sorted from draining LNs, 34 DEGs (12 up- and 22 downregulated) were shared between mice that received WT IL-1 $\beta$  or CD8 $\alpha$  ALN-1 as adjuvant. Here, we identified 15 DEGs (8 up- and 7 downregulated) modulated by WT IL-1 $\beta$  only and 16 DEGs (7 up- and 9 downregulated) uniquely regulated upon CD8 $\alpha$  ALN-1-treatment.

**Supplementary Table 1.** Overview of the used primers for RT-qPCR analysis.

| <b>Gene</b>   | <b>Forward primer (5'-3')</b> | <b>Reverse primer (5'-3')</b> |
|---------------|-------------------------------|-------------------------------|
| <i>IL8</i>    | CTCTCTTGGCAGCCTTCCTGA         | CAATAATTTCTGTGTTGGCGC         |
| <i>NFKBIA</i> | CTCCGAGACTTTCGAGGAAATAC       | GCCATTGTAGTTGGTAGCCTTCA       |
| <i>A20</i>    | CCTTGCTTTGAGTCAGGCTGT         | AAGGAGAAGCACGAAACATC          |
| <i>JUN</i>    | CAGGTGGCACAGCTTAAACA          | GTTTGCAACTGCTGCGTTAG          |
| <i>DUSP</i>   | CTGCCTTGATCAACGTCTCA          | CTGTGCCTTGTGGTTGTCCT          |
| <i>ICAMI</i>  | GCAGACAGTGACCATCTACAGCTT      | CTTCTGAGACCTCTGGCTTCGT        |
| <i>HPRT</i>   | TGACACTGGCAAAACAATGCA         | GGTCCTTTTCACCAGCAAGCT         |

**Supplementary Table 2.** Overview of all DEGs identified in lung and lung-draining LNs upon vaccination with WIV and WT IL-1 $\beta$  or CD8 $\alpha$  ALN-1, compared with mice vaccinated with WIV alone.

| ENSEMBL Gene_ID        | Gene name     | WIV + WT IL-1 $\beta$ |                 |    | WT + CD8 $\alpha$ ALN-1 |                 |    |
|------------------------|---------------|-----------------------|-----------------|----|-------------------------|-----------------|----|
|                        |               | log2FC                | <i>p</i> -value | DE | log2FC                  | <i>p</i> -value | DE |
| <b>Lung parenchyma</b> |               |                       |                 |    |                         |                 |    |
| ENSMUSG00000019987     | Arg1          | 4,05711509            | 1,98608E-17     | 1  | 4,29590228              | 2,93394E-19     | 1  |
| ENSMUSG00000022912     | Prosl         | 2,5996262             | 8,11367E-18     | 1  | 2,39043136              | 1,93275E-15     | 1  |
| ENSMUSG00000009185     | Ccl8          | 2,25720213            | 3,77028E-11     | 1  | 2,63395779              | 1,51232E-14     | 1  |
| ENSMUSG00000033965     | Slc16a2       | 3,29686108            | 1,51687E-08     | 1  | 3,36672083              | 7,94177E-09     | 1  |
| ENSMUSG00000052336     | Cx3cr1        | 0,86365501            | 0,005162968     | 0  | 1,76422628              | 1,05687E-08     | 1  |
| ENSMUSG00000014599     | Csf1          | 2,2351707             | 3,47146E-06     | 1  | 2,75627883              | 1,77563E-08     | 1  |
| ENSMUSG00000055865     | Fam19a3       | 2,75657559            | 5,69926E-11     | 1  | 2,25778529              | 4,88286E-08     | 1  |
| ENSMUSG00000029359     | Tesc          | 0,96307008            | 8,53673E-06     | 0  | 1,12498886              | 1,66132E-07     | 1  |
| ENSMUSG00000079037     | Prnp          | 1,7398404             | 3,04475E-11     | 1  | 1,36337326              | 1,79126E-07     | 1  |
| ENSMUSG00000030352     | Tspan9        | 2,16707305            | 5,73319E-08     | 1  | 2,05959273              | 2,26297E-07     | 1  |
| ENSMUSG00000029304     | Spp1          | 3,02792241            | 6,98512E-05     | 1  | 4,02811783              | 4,23329E-07     | 1  |
| ENSMUSG00000040809     | Chil3         | 3,77836836            | 2,84377E-05     | 1  | 4,76388476              | 4,37864E-07     | 1  |
| ENSMUSG00000039911     | Spsb1         | 1,13324042            | 1,00843E-07     | 1  | 1,03588277              | 1,07963E-06     | 1  |
| ENSMUSG00000042262     | Ccr8          | 3,4415482             | 5,39781E-05     | 1  | 4,23286469              | 1,45142E-06     | 1  |
| ENSMUSG00000032204     | Aqp9          | 1,6685762             | 2,49278E-07     | 1  | 1,54636116              | 1,65235E-06     | 1  |
| ENSMUSG00000030669     | Calca         | 1,13512733            | 0,000910187     | 1  | 1,59391536              | 2,02368E-06     | 1  |
| ENSMUSG00000042359     | Osbpl6        | 1,31840417            | 2,27917E-09     | 1  | 1,02457807              | 3,23103E-06     | 1  |
| ENSMUSG00000061100     | Retnla        | 3,16166848            | 1,10924E-08     | 1  | 2,54793697              | 3,42425E-06     | 1  |
| ENSMUSG00000045573     | Penk          | 2,2632106             | 0,002486791     | 0  | 3,45687142              | 6,81887E-06     | 1  |
| ENSMUSG00000029075     | Tnfrsf4       | 1,42798331            | 0,000198875     | 1  | 1,72891258              | 7,48657E-06     | 1  |
| ENSMUSG00000099413     | Gm17767       | 1,60137183            | 7,9107E-08      | 1  | 1,23661683              | 3,22804E-05     | 1  |
| ENSMUSG00000052117     | D630039A03Rik | 2,21225138            | 3,66814E-06     | 1  | 1,95147548              | 4,03817E-05     | 1  |
| ENSMUSG00000029120     | Ppp2r2c       | 1,71771823            | 0,008234809     | 0  | 2,72549744              | 4,38767E-05     | 1  |
| ENSMUSG00000019122     | Ccl9          | 1,66200345            | 0,001373433     | 0  | 2,12851347              | 5,00545E-05     | 1  |
| ENSMUSG00000055435     | Maf           | 0,61138363            | 0,043916574     | 0  | 1,22278161              | 5,39262E-05     | 1  |
| ENSMUSG00000029153     | Ociad2        | 1,92444424            | 2,35004E-05     | 1  | 1,77497234              | 9,16908E-05     | 1  |
| ENSMUSG00000049410     | Zfp683        | 1,7741495             | 0,002701268     | 0  | 2,3042335               | 0,000103513     | 1  |
| ENSMUSG00000020702     | Ccl1          | 2,88039173            | 0,000290566     | 1  | 3,09514944              | 0,00011028      | 1  |
| ENSMUSG00000028159     | Dapp1         | 1,2210735             | 1,36519E-12     | 1  | 0,86660649              | 4,25477E-07     | 0  |
| ENSMUSG00000024873     | Cnih2         | 0,79937102            | 0,014914871     | 0  | 1,24340553              | 0,000139325     | 1  |
| ENSMUSG00000036067     | Slc2a6        | 2,03424683            | 0,00077107      | 1  | 2,25615002              | 0,000198519     | 1  |
| ENSMUSG00000095105     | Edaradd       | 0,58204527            | 0,106138157     | 0  | 1,30111476              | 0,000230131     | 1  |

|                    |                |            |             |    |            |             |    |
|--------------------|----------------|------------|-------------|----|------------|-------------|----|
| ENSMUSG00000024891 | Slc29a2        | 1,08639527 | 0,000457067 | 1  | 1,08159868 | 0,000425383 | 1  |
| ENSMUSG00000032122 | Slc37a2        | 0,70978204 | 0,015427195 | 0  | 1,02315636 | 0,000476749 | 1  |
| ENSMUSG00000030257 | Srgap3         | 1,56216686 | 0,001013261 | 1  | 1,59815768 | 0,000754643 | 1  |
| ENSMUSG00000047751 | Utf1           | 0,87119172 | 0,056711602 | 0  | 1,52058241 | 0,000833388 | 1  |
| ENSMUSG00000026841 | Fibcd1         | 0,81427195 | 0,074615887 | 0  | 1,50845181 | 0,000850104 | 1  |
| ENSMUSG00000053310 | Nrgn           | 1,40054857 | 0,038368344 | 0  | 2,26662369 | 0,000948457 | 1  |
| ENSMUSG00000076474 | Trbv17         | 1,35625214 | 0,004418586 | 0  | 1,5682474  | 0,001055005 | 1  |
| ENSMUSG00000037820 | Tgm2           | 1,45826264 | 1,44706E-09 | 1  | 0,90985835 | 0,000144036 | 0  |
| ENSMUSG00000040848 | Sft2d2         | 1,03637637 | 2,19136E-09 | 1  | 0,76229809 | 9,97189E-06 | 0  |
| ENSMUSG00000041762 | Gpr155         | 1,14979823 | 8,7733E-09  | 1  | 0,93935052 | 2,48216E-06 | 0  |
| ENSMUSG00000076757 | Tcrg-C4        | 1,58381663 | 1,53385E-07 | 1  | 0,73692229 | 0,017634392 | 0  |
| ENSMUSG00000030748 | Il4ra          | 1,10362954 | 4,56966E-07 | 1  | 0,62094863 | 0,004229953 | 0  |
| ENSMUSG00000049985 | Ankrd55        | 1,29894741 | 1,98788E-05 | 1  | 0,90390611 | 0,003133471 | 0  |
| ENSMUSG00000049555 | Tmie           | 1,01932981 | 0,000104474 | 1  | 0,5844977  | 0,02576124  | 0  |
| ENSMUSG00000090958 | Lrrc32         | 1,76900216 | 0,00019792  | 1  | 1,39752827 | 0,003388024 | 0  |
| ENSMUSG00000103847 | Gm20056        | 1,07489849 | 0,000239112 | 1  | 0,48936367 | 0,107354048 | 0  |
| ENSMUSG00000024653 | Scgb1a1        | 1,27599674 | 0,000430123 | 1  | 0,66349799 | 0,069011614 | 0  |
| ENSMUSG00000044068 | Zrsr1          | 1,07554764 | 0,000462105 | 1  | 0,93732562 | 0,002282321 | 0  |
| ENSMUSG00000026003 | Acadl          | -1,13342   | 2,56996E-09 | -1 | -0,9413783 | 6,67391E-07 | 0  |
| ENSMUSG00000037731 | Themis2        | -1,06868   | 1,47542E-05 | -1 | -0,8920107 | 0,000262705 | 0  |
| ENSMUSG00000036882 | Arhgap33       | -1,0462149 | 4,61725E-05 | -1 | -0,355519  | 0,14784419  | 0  |
| ENSMUSG00000034947 | Tmem106a       | -1,0159908 | 4,94035E-05 | -1 | -0,7532037 | 0,002311443 | 0  |
| ENSMUSG00000030786 | Itgam          | -1,4346074 | 8,40408E-05 | -1 | -1,0021713 | 0,00546377  | 0  |
| ENSMUSG00000020389 | Cdkl3          | -1,121136  | 0,00013493  | -1 | -0,9181567 | 0,001520632 | 0  |
| ENSMUSG00000069662 | Marcks         | -1,0794951 | 0,000643674 | -1 | -0,9001995 | 0,003977419 | 0  |
| ENSMUSG00000002307 | Daxx           | -0,9641876 | 1,25396E-10 | 0  | -1,3716882 | 1,2665E-19  | -1 |
| ENSMUSG00000025498 | Irf7           | -0,8113792 | 2,58602E-10 | 0  | -1,0400238 | 7,28404E-16 | -1 |
| ENSMUSG00000030966 | Trim21         | -0,7979276 | 1,85679E-08 | 0  | -1,1075851 | 8,99017E-15 | -1 |
| ENSMUSG00000027514 | Zbp1           | -0,9168034 | 5,76558E-09 | 0  | -1,1748818 | 1,14271E-13 | -1 |
| ENSMUSG00000060519 | Tor3a          | -0,9737058 | 4,49754E-09 | 0  | -1,2113253 | 4,16894E-13 | -1 |
| ENSMUSG00000035208 | Slfn8          | -0,9413618 | 4,70562E-07 | 0  | -1,3576018 | 6,20358E-13 | -1 |
| ENSMUSG00000069874 | Irgm2          | -0,693458  | 1,42838E-06 | 0  | -1,0256472 | 1,37708E-12 | -1 |
| ENSMUSG00000027078 | Ube2l6         | -0,7735168 | 4,69082E-05 | 0  | -1,3416154 | 4,8373E-12  | -1 |
| ENSMUSG00000046879 | Irgm1          | -0,7415023 | 4,33445E-06 | 0  | -1,0999635 | 1,28939E-11 | -1 |
| ENSMUSG00000043263 | Pyhin1         | -0,9393559 | 8,8686E-09  | 0  | -1,1038808 | 1,67454E-11 | -1 |
| ENSMUSG00000028037 | Ifi44          | -2,4198171 | 1,45743E-16 | -1 | -2,8148523 | 4,27672E-21 | -1 |
| ENSMUSG00000032661 | Oas3           | -0,9133908 | 3,63876E-08 | 0  | -1,0574046 | 2,04254E-10 | -1 |
| ENSMUSG00000078763 | Slfn1          | -0,8274738 | 2,51882E-07 | 0  | -1,0108995 | 3,4441E-10  | -1 |
| ENSMUSG00000043953 | Ccrl2          | -0,9895467 | 7,41914E-07 | 0  | -1,2243972 | 1,13841E-09 | -1 |
| ENSMUSG00000021356 | Irf4           | -0,7174509 | 0,001107453 | 0  | -1,3176557 | 3,30337E-09 | -1 |
| ENSMUSG00000069892 | 9930111J21Rik2 | -0,9531864 | 1,38148E-07 | 0  | -1,0360355 | 1,07752E-08 | -1 |
| ENSMUSG00000066677 | Pydc3          | -0,7603448 | 1,78457E-05 | 0  | -1,0181661 | 1,08409E-08 | -1 |

|                    |                |            |             |    |            |             |    |
|--------------------|----------------|------------|-------------|----|------------|-------------|----|
| ENSMUSG00000033355 | Rtp4           | -1,0899875 | 3,92515E-12 | -1 | -1,4672138 | 2,23446E-20 | -1 |
| ENSMUSG00000039697 | Ncoa7          | -0,8091121 | 0,000593776 | 0  | -1,3547897 | 1,37087E-08 | -1 |
| ENSMUSG00000006345 | Ggt1           | -0,8197185 | 1,92304E-05 | 0  | -1,0872046 | 1,72151E-08 | -1 |
| ENSMUSG00000017830 | Dhx58          | -0,942323  | 1,60569E-05 | 0  | -1,217792  | 3,05952E-08 | -1 |
| ENSMUSG00000078349 | AW011738       | -0,8776424 | 2,41219E-05 | 0  | -1,1539659 | 3,36404E-08 | -1 |
| ENSMUSG00000045932 | Ifit2          | -1,2833196 | 4,38028E-08 | -1 | -1,9552511 | 3,08185E-16 | -1 |
| ENSMUSG00000091144 | Phf11c         | -1,3419377 | 5,48995E-13 | -1 | -1,4994502 | 1,02011E-15 | -1 |
| ENSMUSG00000036381 | P2ry14         | -0,7455419 | 0,001679001 | 0  | -1,3158071 | 5,02145E-08 | -1 |
| ENSMUSG00000070501 | BC094916       | -0,8263604 | 1,57952E-05 | 0  | -1,037525  | 6,83083E-08 | -1 |
| ENSMUSG00000094796 | BC147527       | -0,912573  | 5,90552E-05 | 0  | -1,2014109 | 1,62597E-07 | -1 |
| ENSMUSG00000082292 | Gm12250        | -0,4509113 | 0,019872406 | 0  | -1,005211  | 2,6695E-07  | -1 |
| ENSMUSG00000069893 | 9930111J21Rik1 | -0,8661951 | 7,00369E-05 | 0  | -1,0703578 | 9,92518E-07 | -1 |
| ENSMUSG00000029605 | Oas1b          | -0,6308381 | 0,00775449  | 0  | -1,0552358 | 1,05748E-05 | -1 |
| ENSMUSG00000073491 | Pydc4          | -0,9410605 | 8,37799E-05 | 0  | -1,0288438 | 1,79793E-05 | -1 |
| ENSMUSG00000039236 | Isg20          | -1,3483339 | 8,18696E-12 | -1 | -1,5425013 | 7,16068E-15 | -1 |
| ENSMUSG00000054404 | Slfn5          | -1,4905379 | 2,79577E-07 | -1 | -2,3153528 | 8,72872E-15 | -1 |
| ENSMUSG00000044734 | Serpinb1a      | -0,7717839 | 0,001697613 | 0  | -1,0180339 | 3,97168E-05 | -1 |
| ENSMUSG00000035517 | Tdrd7          | -0,6408535 | 0,019132996 | 0  | -1,0513343 | 0,000151456 | -1 |
| ENSMUSG00000026880 | Stom           | -0,8847861 | 0,002124242 | 0  | -1,0570212 | 0,000256837 | -1 |
| ENSMUSG00000023341 | Mx2            | -1,651011  | 1,32111E-06 | -1 | -2,6776885 | 4,42714E-14 | -1 |
| ENSMUSG00000020638 | Cmpk2          | -1,7704884 | 3,03101E-11 | -1 | -2,0251802 | 4,8981E-14  | -1 |
| ENSMUSG00000079017 | Ifi2712a       | -1,5155727 | 4,15276E-13 | -1 | -1,577349  | 4,9091E-14  | -1 |
| ENSMUSG00000030107 | Usp18          | -1,0034437 | 3,43408E-07 | -1 | -1,4713893 | 1,4993E-13  | -1 |
| ENSMUSG00000034459 | Ifit1          | -1,7311148 | 9,52699E-08 | -1 | -2,453831  | 1,68862E-13 | -1 |
| ENSMUSG00000034855 | Cxcl10         | -1,4544659 | 4,03181E-09 | -1 | -1,7707311 | 1,55693E-12 | -1 |
| ENSMUSG00000035692 | Isg15          | -1,2879742 | 2,13371E-07 | -1 | -1,7602272 | 2,75438E-12 | -1 |
| ENSMUSG00000026896 | Ifih1          | -1,1279316 | 8,72075E-08 | -1 | -1,4874444 | 2,80709E-12 | -1 |
| ENSMUSG00000040483 | Xaf1           | -1,0156472 | 3,33222E-09 | -1 | -1,1906955 | 4,97549E-12 | -1 |
| ENSMUSG00000018986 | Slfn3          | -1,2641461 | 3,6997E-08  | -1 | -1,5666263 | 1,56405E-11 | -1 |
| ENSMUSG00000074896 | Ifit3          | -1,4938574 | 3,51448E-06 | -1 | -2,2207335 | 1,71259E-11 | -1 |
| ENSMUSG00000091649 | Phf11b         | -1,1186913 | 1,94135E-12 | -1 | -1,0513731 | 3,268E-11   | -1 |
| ENSMUSG00000025743 | Sdc3           | -1,1899111 | 8,39715E-09 | -1 | -1,3523276 | 6,94628E-11 | -1 |
| ENSMUSG00000041827 | Oasl1          | -1,7489338 | 2,54327E-06 | -1 | -2,4644078 | 1,10655E-10 | -1 |
| ENSMUSG00000000386 | Mx1            | -1,647277  | 7,28894E-08 | -1 | -1,9922848 | 1,22035E-10 | -1 |
| ENSMUSG00000062488 | Ifit3b         | -1,9742997 | 1,16064E-06 | -1 | -2,5263631 | 1,1823E-09  | -1 |
| ENSMUSG00000067297 | Ifit1bl2       | -1,4000766 | 7,17677E-05 | -1 | -2,2155706 | 1,43437E-09 | -1 |
| ENSMUSG00000037849 | Gm4955         | -1,2209231 | 1,23405E-06 | -1 | -1,5132802 | 2,4825E-09  | -1 |
| ENSMUSG00000020641 | Rsad2          | -1,6814335 | 2,03892E-05 | -1 | -2,3977183 | 3,2054E-09  | -1 |
| ENSMUSG00000052776 | Oas1a          | -1,1907072 | 1,91488E-06 | -1 | -1,4233934 | 1,51428E-08 | -1 |
| ENSMUSG00000032690 | Oas2           | -1,2338848 | 0,000238711 | -1 | -1,803155  | 1,29475E-07 | -1 |
| ENSMUSG00000021190 | Lgmn           | -1,5710594 | 1,24926E-08 | -1 | -1,4417479 | 1,3868E-07  | -1 |
| ENSMUSG00000035493 | Tgfbi          | -2,0602198 | 6,7455E-07  | -1 | -2,1202142 | 3,27653E-07 | -1 |

|                                              |               |            |             |    |            |             |    |
|----------------------------------------------|---------------|------------|-------------|----|------------|-------------|----|
| ENSMUSG00000079339                           | Ifit1bl1      | -1,5850687 | 0,00019635  | -1 | -2,1493129 | 7,22534E-07 | -1 |
| ENSMUSG00000078616                           | Trim30c       | -1,3606698 | 4,45107E-06 | -1 | -1,4611364 | 8,75847E-07 | -1 |
| ENSMUSG00000044703                           | Phf11a        | -1,7046824 | 1,36514E-09 | -1 | -1,345235  | 1,2163E-06  | -1 |
| ENSMUSG00000024079                           | Eif2ak2       | -1,1697848 | 6,01846E-05 | -1 | -1,4191296 | 1,30396E-06 | -1 |
| ENSMUSG00000049608                           | Gpr55         | -1,0942929 | 0,000401493 | -1 | -1,4379794 | 4,17759E-06 | -1 |
| ENSMUSG00000032359                           | Ctsh          | -1,095481  | 3,06596E-05 | -1 | -1,1013949 | 2,61715E-05 | -1 |
| ENSMUSG00000026535                           | Ifi202b       | -1,1975888 | 0,00098766  | -1 | -1,5168638 | 3,72111E-05 | -1 |
| ENSMUSG00000075602                           | Ly6a          | -1,1800157 | 8,53629E-05 | -1 | -1,197081  | 6,76324E-05 | -1 |
| ENSMUSG00000025492                           | Ifitm3        | -1,4283248 | 0,000581796 | -1 | -1,5599241 | 0,000181309 | -1 |
| ENSMUSG00000003545                           | Fosb          | -1,7769018 | 4,37802E-06 | -1 | -1,4046676 | 0,000235493 | -1 |
| <b>Lung-draining mediastinal lymph nodes</b> |               |            |             |    |            |             |    |
| ENSMUSG00000003545                           | Fosb          | -3,0817279 | 2,91242E-13 | -1 | -3,3189305 | 6,13461E-15 | -1 |
| ENSMUSG00000076614                           | Ighg1         | 4,17482229 | 5,21065E-10 | 1  | 5,34392845 | 4,90133E-14 | 1  |
| ENSMUSG00000003032                           | Klf4          | -1,8340445 | 2,41405E-09 | -1 | -1,9679008 | 1,67025E-10 | -1 |
| ENSMUSG00000021250                           | Fos           | -1,1416387 | 1,26382E-06 | -1 | -1,4453601 | 8,84448E-10 | -1 |
| ENSMUSG00000054364                           | Rhob          | -0,8091276 | 2,09877E-06 | 0  | -1,02952   | 1,64571E-09 | -1 |
| ENSMUSG00000033355                           | Rtp4          | -1,0302063 | 2,39478E-09 | -1 | -1,0172309 | 3,766E-09   | -1 |
| ENSMUSG00000028037                           | Ifi44         | -1,8596369 | 6,2858E-09  | -1 | -1,800561  | 1,65708E-08 | -1 |
| ENSMUSG00000027078                           | Ube2l6        | -0,8548343 | 7,3861E-05  | 0  | -1,1981519 | 3,53221E-08 | -1 |
| ENSMUSG00000026628                           | Atf3          | -0,8026744 | 0,00234032  | 0  | -1,471968  | 4,80296E-08 | -1 |
| ENSMUSG00000065922                           | n-R5-8s1      | -1,6187259 | 7,05121E-06 | -1 | -1,9706953 | 5,6767E-08  | -1 |
| ENSMUSG00000039236                           | Isg20         | -1,1998699 | 8,56547E-08 | -1 | -1,1947154 | 9,16149E-08 | -1 |
| ENSMUSG00000042622                           | Maff          | -0,9266496 | 8,97217E-06 | 0  | -1,1095909 | 1,07989E-07 | -1 |
| ENSMUSG00000062593                           | Lilrb4a       | 1,63827098 | 2,13744E-06 | 1  | 1,5781239  | 4,94384E-06 | 1  |
| ENSMUSG00000037849                           | Gm4955        | -1,1089818 | 6,10502E-05 | -1 | -1,2633452 | 4,99905E-06 | -1 |
| ENSMUSG00000034459                           | Ifit1         | -1,3323291 | 0,000145901 | -1 | -1,5689792 | 8,0168E-06  | -1 |
| ENSMUSG00000017830                           | Dhx58         | -0,9048185 | 0,000182024 | 0  | -1,032352  | 1,96258E-05 | -1 |
| ENSMUSG00000076613                           | Ighg2b        | 0,96920787 | 0,084325298 | 0  | 2,49722694 | 2,66664E-05 | 1  |
| ENSMUSG00000075602                           | Ly6a          | -1,52039   | 3,43703E-06 | -1 | -1,3512502 | 3,6224E-05  | -1 |
| ENSMUSG00000034855                           | Cxcl10        | -1,1786243 | 9,42142E-06 | -1 | -1,0725535 | 5,36259E-05 | -1 |
| ENSMUSG00000022912                           | Prosl         | 1,80960591 | 8,4399E-07  | 1  | 1,44135199 | 8,28765E-05 | 1  |
| ENSMUSG00000057329                           | Bcl2          | 1,38018861 | 6,10313E-07 | 1  | 1,07130406 | 8,82366E-05 | 1  |
| ENSMUSG00000074896                           | Ifit3         | -1,2649294 | 0,000336824 | -1 | -1,3754694 | 9,81573E-05 | -1 |
| ENSMUSG00000076522                           | Igkv16-104    | 0,78020131 | 0,448734986 | 0  | 3,86908725 | 0,000122915 | 1  |
| ENSMUSG00000033965                           | Slc16a2       | 2,53569445 | 0,000101252 | 1  | 2,43925688 | 0,000173491 | 1  |
| ENSMUSG00000097971                           | Gm26917       | -1,3212673 | 0,00061325  | -1 | -1,4422058 | 0,000185952 | -1 |
| ENSMUSG00000020882                           | Cacnb1        | 1,10538898 | 4,36299E-05 | 1  | 1,00889465 | 0,000186842 | 1  |
| ENSMUSG00000085028                           | Slc2a4rg-ps   | 1,0986135  | 6,86719E-05 | 1  | 1,02731196 | 0,000190872 | 1  |
| ENSMUSG00000097061                           | 9330151L19Rik | 1,17699018 | 5,87438E-05 | 1  | 1,0863881  | 0,000202039 | 1  |
| ENSMUSG00000103593                           | Gm37352       | -0,8906948 | 0,004289023 | 0  | -1,1353236 | 0,000281685 | -1 |
| ENSMUSG00000089672                           | Lilr4b        | 1,8496286  | 1,47315E-06 | 1  | 1,37654361 | 0,000303076 | 1  |
| ENSMUSG00000020638                           | Cmpk2         | -1,1484957 | 7,52954E-05 | -1 | -1,0412255 | 0,000324891 | -1 |

|                    |               |            |             |    |            |             |    |
|--------------------|---------------|------------|-------------|----|------------|-------------|----|
| ENSMUSG00000037465 | Klf10         | -1,1079968 | 6,52887E-06 | -1 | -0,8820539 | 0,000330695 | 0  |
| ENSMUSG00000085396 | Firre         | 1,54235327 | 8,31202E-05 | 1  | 1,40252168 | 0,000362088 | 1  |
| ENSMUSG00000067149 | Jchain        | 1,645183   | 0,011916432 | 0  | 2,38764376 | 0,000418234 | 1  |
| ENSMUSG00000076934 | Iglv1         | 1,08163975 | 0,106720361 | 0  | 2,3987837  | 0,000448506 | 1  |
| ENSMUSG00000076612 | Ighg2c        | 2,13683457 | 0,00957009  | 0  | 2,99560755 | 0,000506888 | 1  |
| ENSMUSG00000044583 | Tlr7          | -1,0373085 | 0,001392533 | 0  | -1,1147491 | 0,000610562 | -1 |
| ENSMUSG00000092274 | Neat1         | 1,31316326 | 0,001174731 | 0  | 1,38087598 | 0,000668034 | 1  |
| ENSMUSG00000032204 | Aqp9          | 1,27676229 | 0,00060216  | 1  | 1,19612354 | 0,001286767 | 0  |
| ENSMUSG00000014932 | Yes1          | 1,13397374 | 2,70791E-05 | 1  | 0,85677188 | 0,001593291 | 0  |
| ENSMUSG00000023348 | Trip6         | 1,65309047 | 0,000225556 | 1  | 1,40282877 | 0,001669877 | 0  |
| ENSMUSG00000030651 | Art2b         | 1,03880844 | 0,000341106 | 1  | 0,88424178 | 0,002197629 | 0  |
| ENSMUSG00000058773 | Hist1h1b      | -1,6806687 | 0,000359909 | -1 | -1,3747913 | 0,003298826 | 0  |
| ENSMUSG00000026285 | Pdcd1         | -1,2247041 | 0,000283558 | -1 | -0,9574842 | 0,004450772 | 0  |
| ENSMUSG00000044068 | Zrsr1         | 1,48617691 | 3,89184E-05 | 1  | 0,9881265  | 0,006178052 | 0  |
| ENSMUSG00000028341 | Nr4a3         | -1,0015257 | 5,87175E-05 | -1 | -0,6580178 | 0,008364033 | 0  |
| ENSMUSG00000015437 | Gzmb          | -1,5988982 | 0,0006972   | -1 | -1,1899122 | 0,011468658 | 0  |
| ENSMUSG00000025350 | Rdh5          | 1,5759155  | 0,000127307 | 1  | 0,91061354 | 0,028734819 | 0  |
| ENSMUSG00000052736 | Klrc2         | -1,231146  | 0,000792997 | -1 | -0,7669356 | 0,035268974 | 0  |
| ENSMUSG00000108132 | RP23-322E20.8 | 1,04689159 | 0,000436622 | 1  | 0,57982271 | 0,050192788 | 0  |
| ENSMUSG00000020841 | Cpd           | -1,4410335 | 0,000702326 | -1 | -0,6507141 | 0,121780333 | 0  |
